# Supplementary material for: Practice Model of Unit-based Clinical Pharmacists' Individualized Daily AUD Monitoring Report on Antimicrobial Stewardship in ICU of a tertiary hospital in Guangxi, China: An Interrupted Time Series Analysis
Source: Research Square preprint supplement (doi:10.21203/rs.3.rs-8726337/v1), 2026-02-23
Supplement: Supplementary file 1 [file 5ba244dc9dd62e5ca30b2ceb.docx]

**Table S1. Comparison of antibiotic classifications between WHO AWaRe and Guangxi of China local policy**

| **Feature** | **WHO AWaRe (2021)** | **Guangxi of China Provincial Catalogue (2023)** |
| --- | --- | --- |
| Primary Focus | Ecological Impact: Resistance potential & Clinical importance. | Administrative Control: Prescribing authority, cost, & safety. |
| Tier 1 (Base) | Access: Promote usage (>60% goal). | Non-restricted: Open to all doctors. |
| Tier 2 (Focus) | Watch: Key targets for stewardship. | Restricted: Attending physicians only. |
| Tier 3 (Top) | Reserve: Last-resort options only. | Special Grade: Senior physicians + Consultation required. |
| Key Divergence | Carbapenems & Glycopeptides are classified as "Watch". | Carbapenems & Glycopeptides are elevated to "Special Grade". |
| Implication | Focuses on reducing "Reserve" agents (e.g., Tigecycline). | Focuses on controlling a broader range of critical drugs (including Carbapenems). |
